# Supplementary material for: JMJD3 acts in tandem with KLF4 to facilitate reprogramming to pluripotency
Source: PubMed Central journal article supplement (PMC7545202; doi:10.1038/s41467-020-18900-z), 2020-10-08
Supplement: 41467_2020_18900_MOESM4_ESM.pdf [file 41467_2020_18900_MOESM4_ESM.pdf]

## **Descriptonal of Additional Supplementary Files**

**File Name: Supplementary Data 1**

Description: List of proteins identified by mass spectrometry analysis of JMJD3 and UTX complexes, OSKM+Vc – day 5.

**File Name: Supplementary Data 2**

Description: List of primers used in this study.

**File Name: Supplementary Data 3**

Description: Differentially expressed genes from RNA-seq data.

**File Name: Supplementary Data 4**

Description: Reads of H3K27me3 ChIP-seq; H3K27me3 levels at TSS and TTS of all transcripts, and at ESC-specific enhancers; H3K27me3 and H3K27ac levels at KLF4 peaks.
